# Supplementary material for: The RNA Directed DNA Methylation (RdDM) Pathway Regulates Anthocyanin Biosynthesis in Crabapple (Malus cv. spp.) Leaves by Methylating the McCOP1 Promoter
Source: MDPI journal article supplement (doi:10.3390/plants10112466), 2021-11-15
Supplement: s1 [file s1]

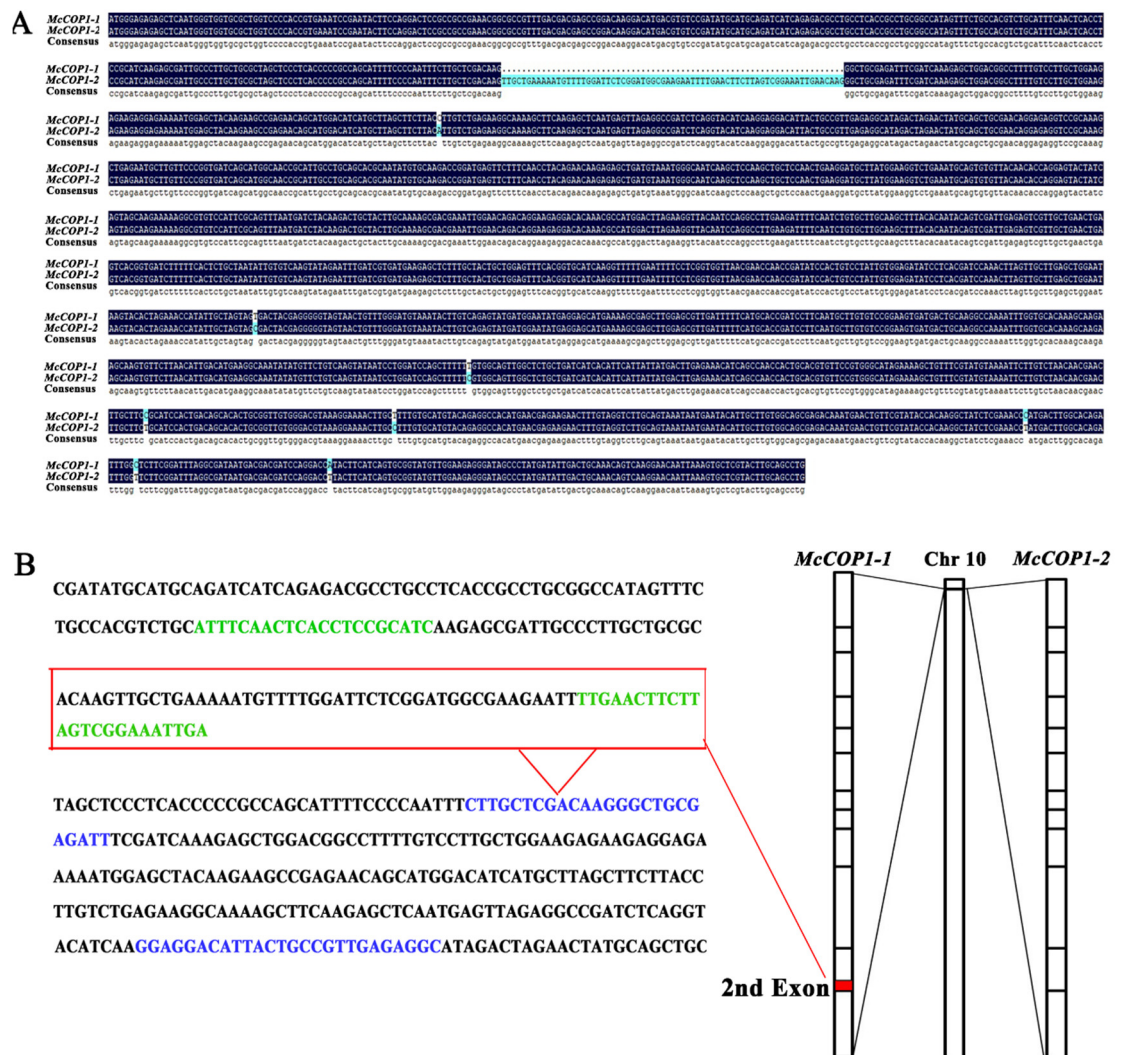

**Supplementary Figure S1.** Cloning and sequence characterization of *McCOP1-1* and *McCOP1-2*.

A. *McCOPI* nucleotide sequence alignment. B. Location of *McCOPI* coding sequences on chromosome 10. The sequence in the box is the 69-bp deletion in the *McCOPI-1* gene. Blue and green font represent the Real time (RT)-quantitative (q)PCR primers for *McCOPI-1* and *McCOPI-2*, respectively. Abbreviations: Md, *Malus x domestica* (AB668570.1); Rosa, *Rosa* spp. *hybrid cultivar* (AF394913.1).

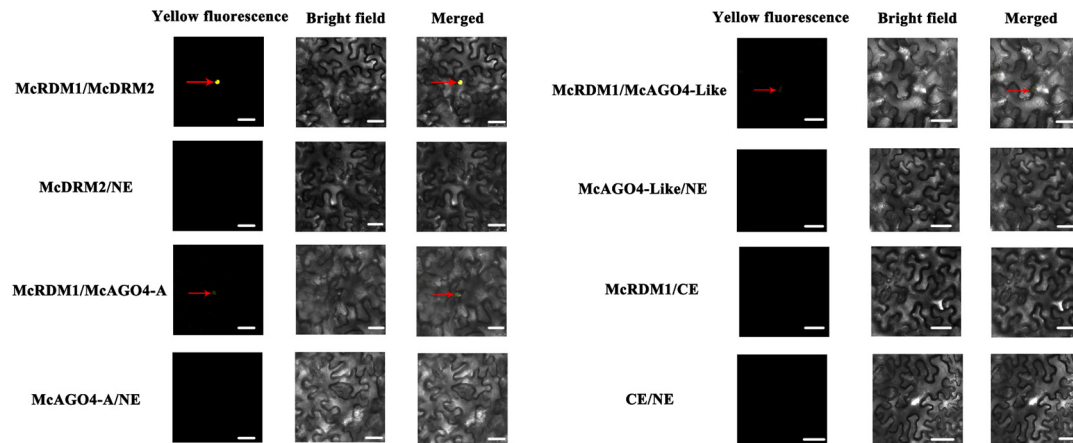

**Supplementary Figure S2.** Interaction between McRDM1, McRDM2, and McAGO4. Bimolecular fluorescent complementation (BiFC) assay using *Nicotiana benthamiana*. Fusion constructs containing partial yellow fluorescent protein sequences and McRDM1/McDRM2, McRDM1/McAGO4-A and McRDM1/McAGO4-like were transiently co-expressed in *Nicotiana benthamiana* leaves. The yellow fluorescence represents protein interactions. **Scale bar=20  $\mu$ m.**

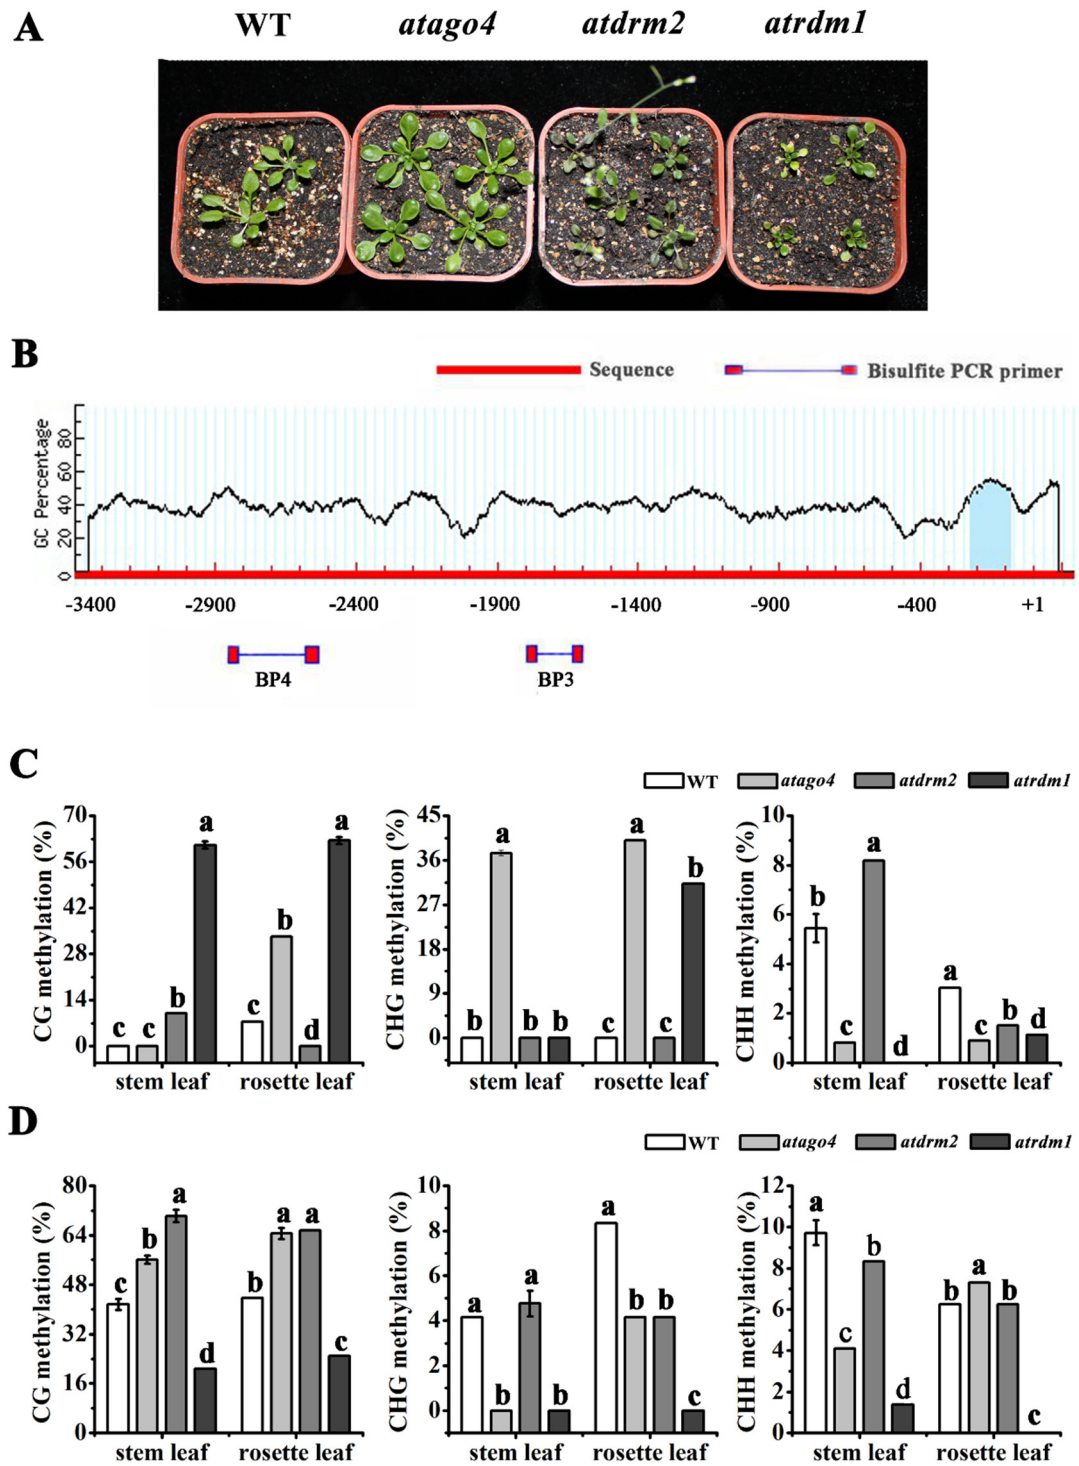

**Supplementary Figure S3.** *AtCOP1* promoter methylation level determined by bisulfite sequencing using different primers. A. The phenotype of WT, *atago4*, *atdrm2* and *atrdm1* seedlings. B. The position of BP3 and BP4 primers in the promoter sequence. C. *AtCOP1* promoter methylation level using BP3 primers. D. *AtCOP1* promoter methylation level using BP4 primers.



Error bars indicate the standard error of the mean  $\pm$  SE of three replicate measurements. Different letters above the bars indicate significantly different values ( $p < 0.05$ ) calculated using one-way analysis of variance (ANOVA) followed by a Duncan's multiple range test.

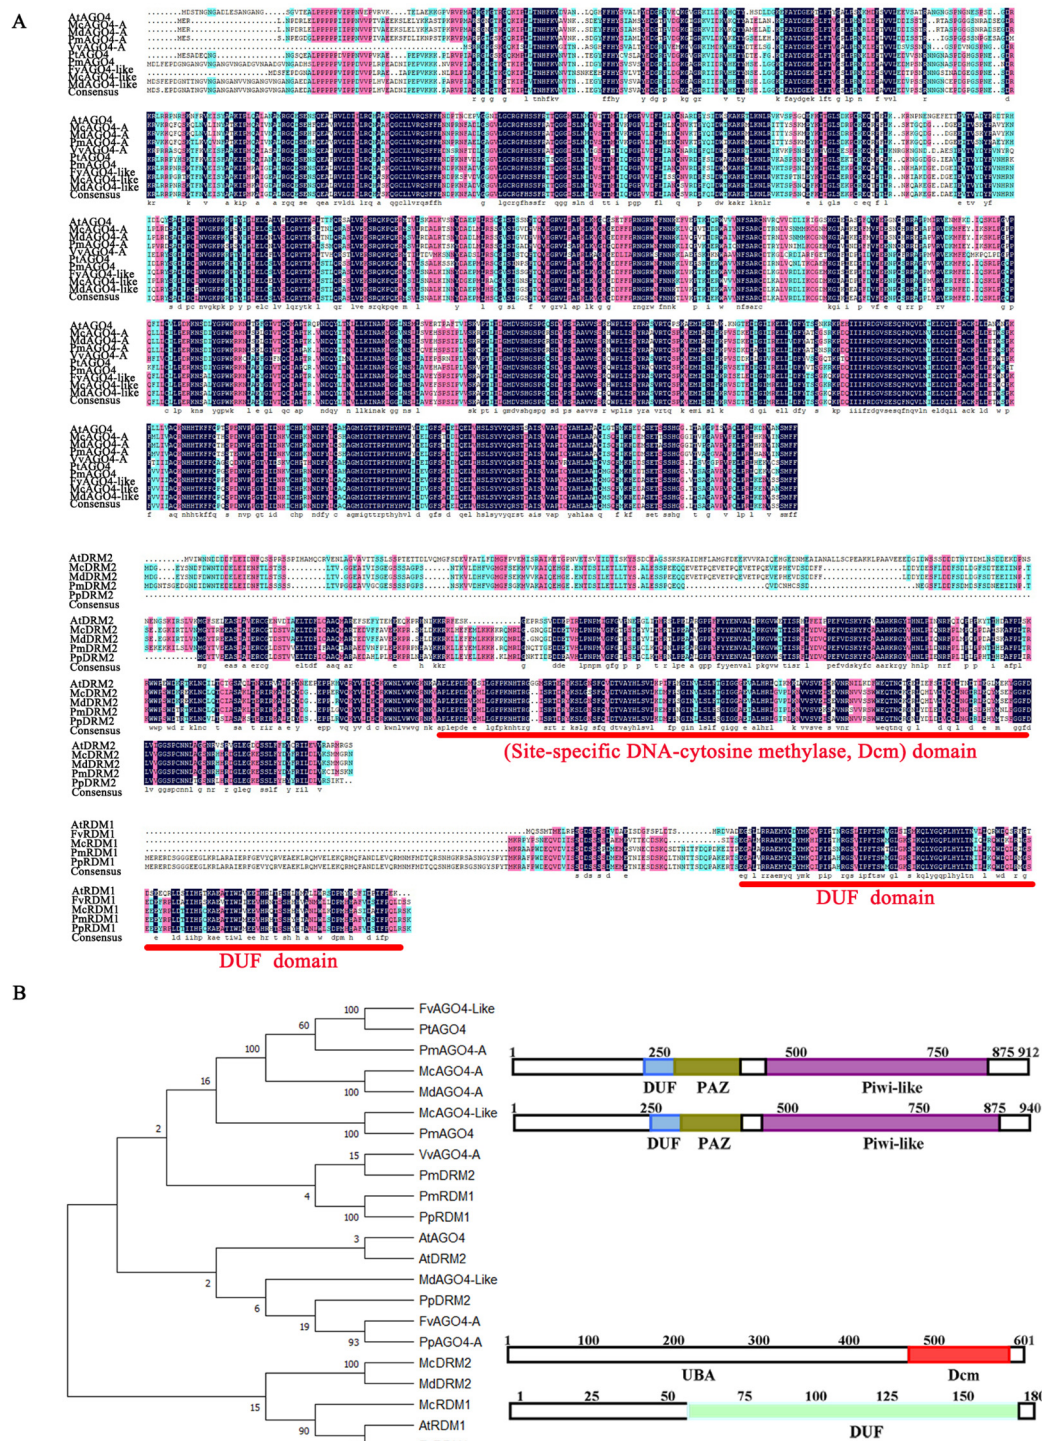

**Supplementary Figure S4.** Sequence analysis of McAGO4-Like, McAGO4-A, McDRM2 and

McRDM1. A. Amino acid sequence alignment. B. Phylogenetic analysis of McCOP1 proteins from different plant species and functional domain analysis. The alignment was conducted with the **Mega10** program using ClustalX. The abbreviations used are as follows: Md, *Malus x domestica*; Pp, *Prunus persica*; Pm, *Prunus mume*; Fv, *Fragaria vesca* spp.; Vv, *Vitis vinifera*; At, *Arabidopsis thaliana*.

## Supplementary Tables

**Supplementary Table S1.** Primer sequences used in this study

| Primer               | Oligonucleotide sequence 5' -> 3' |
|----------------------|-----------------------------------|
| <b>Cloning</b>       |                                   |
| Q-McCOP1-F           | GAAGTATTCGGATTTACGGTGGGGAC        |
| Q-McCOP1-R           | GACCTCCCAATTCTCGAAGGCCAAA         |
| McCOP1-F             | TCACGCACGCTTCACCCAGA              |
| McCOP1-R             | TGTAGCGATTCAAGACGGGGTT            |
| McAGO4-A-F           | GGCTTGTGGTTGAGCAGGTCTTAG          |
| McAGO4-A-R           | CGGCATCGAGGGATAAGAAACTGAAG        |
| McAGO4-Like-F        | CACGGCTGGATTTCAGAAGCGGTT          |
| McAGO4-Like-R        | GGTAACCATAGTAGGGCTCAAGGCTC        |
| McDRM2-F             | GGAGCTTGTAATCGCTGCGTGGGC          |
| McDRM2-R             | CCACAAGTAACCAGCCGACCGCAC          |
| McRDM1-F             | GTTTACAATGGATCCCACACG             |
| McRDM1R              | CCAAGCATCATAAAACAGTCC             |
| <b>Y1H</b>           |                                   |
| YEMcAGO4-A-XhoI-F    | AACTCGAGATGGAGCGCTTGAATCCCG       |
| YEMcAGO4-A-NotI-R    | TAGCGGCCGCTTAACAGAAGAACATGGAG     |
| YEMcAGO4-Like-XhoI-F | CTCTCGAGATGGATTCGTTTGAGCCAGATG    |
| YEMcAGO4-Like-NotI-R | TAGCGGCCGCTCAACAGAAGAACATG        |
| YEMcDRM2-EcoRI-F     | CGGAATTCATGGATGGTGAATACAGTAATG    |
| YEMcDRM2-XhoI-R      | TCTCGAGTCAATTGTTTCTTCCCATCATG     |
| YEMcCOP1-EcoRI-F     | ACGAATTCGACCTCCCAATTCTCG          |

YEMcCOP1-XhoI-R

ACCTCGAGGAAGTATTCGGATTTCAC

### **BiFC**

McCOP1s-SalI-F

ACGC GTCGAC ATGGGAGAGAGCTCAATGG

McCOP1s-KpnI-R

CCGG GGTACC GGCTGCAAGTACGAGCAC

McMYB10-SalI-F

ACGC GTCGAC ATGGAGGGATATAACGAA

McMYB10-KpnI-R

CCGG GGTACC TTCTTCTTTTGAATGATTC

McAGO4-A-SalI-F

ACGC GTCGAC ATGGAGCGCTTGAATCCC

McAGO4-A-KpnI-R

CCGG GGTACC ACAGAAGAACATGGAGTTG

McAGO4-Like-SalI-F

ACGC GTCGAC ATGGATTTCGTTTGAGCCAG

McAGO4-Like-KpnI-R

CCGG GGTACC ACAGAAGAACATGGAACTG

McDRM2-SalI-F

ACGC GTCGAC ATGGATGGTGAATACAGT

McDRM2-KpnI-R

CCGG GGTACC ATTGTTTCTTCCCATCATGC

McRDM1-SalI-F

CCGC GGATCC ATGAAGAGGGCAGCTCCC

McRDM1-KpnI-R

CCGG GGTACC CGATTGCTTCGTAGCTGG

### **BPS**

BP1-F

TTGTTTTTTTGATTGATGATTAAAT

BP1-R

TATACATATTTACTCTATTCCTAACTCCTC

BP2-F

TGTGTTTTTGATAAATGTTTTTTTT

BP2-R

AATCTACAATACCTTCACAATCTATTTAAA

BP3-F

ATAAGATTTATTTTGATATTTTGAAA

BP3-R

TACTATTAATCCTCTACCACAAAAC

BP4-F

ATTTTATTGAAAATTGGA AAA

BP4-R

CATATAAAAATTAAAACAACACACC

### **qRT-PCR**

---

---

|                   |                            |
|-------------------|----------------------------|
| qMc/MdCOP1-1-F    | ATTTCAACTCACCTCCGCATC      |
| qMc/MdCOP1-1-R    | TCAATTTCCGACTAAGAAGTTCAAA  |
| qMc/MdCOP1-2-F    | CTTGCTCGACAAGGGCTGCGAGATT  |
| qMc/MdCOP1-2-R    | GCCTCTCAACGGCAGTAATGTCCTCC |
| qMc/MdMYB10-F     | GGACCAGCAGCAGGAAACTA       |
| qMc/MdMYB10-R     | ACAACCCTCCATTAATGCCGAC     |
| qMc/MdAGO4-A-F    | CTCCACCACCACCCATTATTCC     |
| qMc/MdAGO4-A-R    | TGCCCTTTAGTTCCATTCCCAC     |
| qMc/MdAGO4-Like-F | CTATGATGGGGAGAAGAGCCTG     |
| qMc/MdAGO4-Like-R | ACAGTTTCCATTGTTCTGCTTG     |
| qMc/MdDRM2-F      | TTTTTTGCGGTTGAAGAGAAGCC    |
| qMc/MdDRM2-R      | TGAACTGTCTCATCATCATCCCCT   |
| qMc/MdRDM1-F      | ACCTCACCAATCTTCTCCTAAAACA  |
| qMc/MdRDM1-R      | TGGCTTCGGCTTTACAAGGATG     |
| qMc/MdCHS-F       | GGAGACAACTGGAGAAGGACTGGAA  |
| qMc/MdCHS-R       | CGACATTGATACTGGTGTCTTCA    |
| qMc/MdF3'H-F      | ACGATGGCGGATGTTACGG        |
| qMc/MdF3'H-R      | GCTTTGACCCTGCACTTGCT       |
| qMc/MdDFR-F       | GATAGGGTTTGAGTTCAAGTA      |
| qMc/MdDFR-R       | TCTCCTCAGCAGCCTCAGTTTTCT   |
| qMc/MdANS-F       | GGAGAAGATCATCCTTAAGCCA     |
| qMc/MdANS-R       | CTAAGATATATCATACCAACTATGCC |
| qMc/MdUFGT-F      | CCACCGCCCTTCCAAACACTCT     |
| qMc/MdUFGT-R      | CACCCTTATGTTACGCGGCATGT    |



|            |                          |
|------------|--------------------------|
| qMc18S-F   | ACACGGGGAGGTAGTGACAA     |
| qMc18S-R   | CCTCCAATGGATCCTCGTTA     |
| qAtCHS-F   | GCCGAGAACAATCGTGGAGCA    |
| qAtCHS-R   | AGTCAAGGTGGGTGTCAGAGG    |
| qAtF3'H -F | TGGTAAAAAAGGAGGATTCAT    |
| qAtF3'H-R  | CCGTGAGTAGTCTCTGTTTCT    |
| qAtDFR-F   | TGGTGTCGGTCCATTCAT       |
| qAtDFR-R   | GAGAGAGCGCGGTGATAAGG     |
| qAtUFGT-F  | TGGAGGTGGCGGTTGAA        |
| qAtUFGT-R  | CTTTGCCGCGAGAACCA        |
| qAtANS-F   | AATGGAGCGTGTCAAGAAAGC    |
| qAtANS-R   | TTGAATCTTTCCAGTGGCTTG    |
| qAtAGO4-F  | ATTGTTACTCAATGCATGGCTC   |
| qAtAGO4-R  | GTGTCCGAACAGATGCTCTATA   |
| qAtDRM2-F  | ATGGTGATTTGGAATAACGA     |
| qAtDRM2-R  | TCAAGATCCTCTCATCCTCG     |
| qAtRDM1-F  | CAATGACAATGGAACTACGACC   |
| qAtRDM1-R  | ATACATCTCTGCTCTTCTCAGC   |
| qAtCOP1-F  | GTTGCTTGAGTTGGAATAAGCA   |
| qAtCOP1-R  | AAACTTTAACCTTGCAGTCGTC   |
| qAtMYB75-F | TTCCTGTAAGAGCTGGGCTA     |
| qAtMYB75-R | TTAAAGACCACCTATTCCCT     |
| qAtACTIN-F | CTCTCCCGCTATGTATGTGCGCCA |
| qAtACTIN-R | GTGAGACACACCATCACCAG     |

---

**Supplementary Table S2.** Correlation analysis between the *McCOP1* promoter methylation level and *McCOP1* RNA expression profiles in ‘Radiant’ leaves.

| Correlation coefficient<br>values |          | McCOP1 expression<br>levels |              | CG methylation |         |          | CHG methylation |         |          | CHH methylation |         |          |
|-----------------------------------|----------|-----------------------------|--------------|----------------|---------|----------|-----------------|---------|----------|-----------------|---------|----------|
|                                   |          | McCOP<br>1-1                | McCOP<br>1-2 | BP1            | BP2     | BP1+ BP2 | BP1             | BP2     | BP1+ BP2 | BP1             | BP2     | BP1+ BP2 |
| McCOP1s<br>expression<br>level    | McCOP1-1 | 1                           | 0.95**       | -0.24          | -0.48** | -0.48**  | 0.11            | -0.43*  | -0.31    | 0.27            | -0.70** | -0.72**  |
|                                   | McCOP1-2 | 0.95**                      | 1            | -0.27          | -0.48** | 0.49**   | 0.11            | -0.42*  | -0.31    | 0.21            | -0.70** | -0.72**  |
| CG<br>methylation                 | BP1      | -0.24                       | -0.27        | 1              | 0.26    | 0.29     | -0.63**         | -0.23   | -0.48**  | 0.48**          | 0.23    | 0.31     |
|                                   | BP2      | -0.48**                     | -0.48**      | 0.26           | 1       | 1.00**   | -0.18           | 0.47**  | 0.32     | -0.53**         | 0.88**  | 0.87**   |
|                                   | BP1+BP2  | -0.48**                     | -0.49**      | 0.29           | 1.00**  | 1        | -0.2            | 0.46**  | 0.3      | -0.51**         | 0.88**  | 0.88**   |
| CHG<br>methylation                | BP1      | 0.11                        | 0.11         | -0.63**        | -0.18   | -0.2     | 1               | 0.09    | 0.53**   | -0.1            | -0.21   | -0.24    |
|                                   | BP2      | -0.43*                      | -0.42*       | -0.23          | 0.47**  | 0.46**   | 0.09            | 1       | 0.89**   | -0.78**         | 0.73**  | 0.69**   |
|                                   | BP1+BP2  | -0.31                       | -0.31        | -0.48**        | 0.32    | 0.3      | 0.53**          | 0.89**  | 1        | -0.71**         | 0.53**  | 0.48**   |
| CHH<br>methylation                | BP1      | 0.27                        | 0.21         | 0.48**         | 0.53**  | -0.51**  | -0.1            | -0.78** | -0.71**  | 1               | -0.59** | -0.51**  |
|                                   | BP2      | -0.70**                     | -0.70**      | 0.23           | 0.88**  | 0.88**   | -0.21           | 0.73**  | 0.53**   | -0.59**         | 1       | 1.00**   |
|                                   | BP1+BP2  | -0.72**                     | -0.72**      | 0.31           | 0.87**  | 0.88**   | -0.24           | 0.69**  | 0.48**   | -0.51**         | 1.00**  | 1        |

\* p<0.05 \*\* p<0.01
